# Supplementary material
Source: HighWire-hosted journal article supplement (https://erj.ersjournals.com/content/54/1/1801896)

**Supplemental Figure S1. Propensity score (PS) overlap and cutoffs for decile of PS for the macrolide monotherapy group. Deciles were defined based on macrolide monotherapy PS to ensure balanced numbers in each decile.**

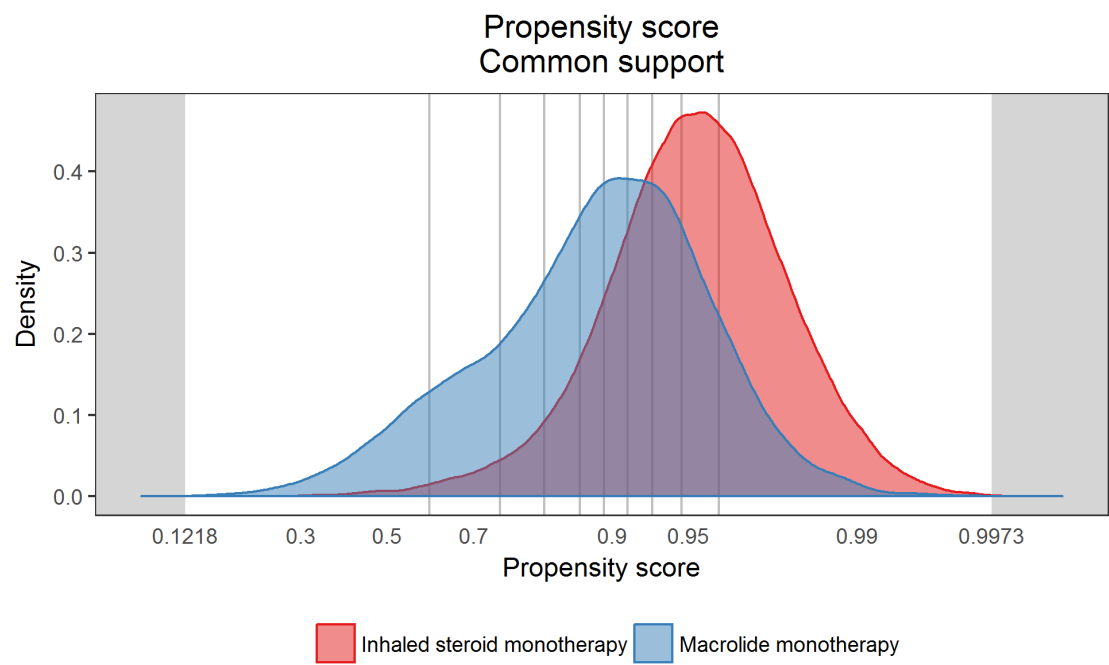

**Supplemental Figures S2a-f. Comparison of balancing of key variables by exposure group (inhaled corticosteroids and macrolide monotherapy) and propensity score decile. Balancing for a given variable is indicated by having a similar proportion in the two exposure groups within a propensity score decile.**

**Figure S2a. Proportion with NTM history**

**Figure S2b. Proportion with *Pseudomonas* history**

**Figure S2c. Proportion with COPD history**

**Figure S2d. Proportion with asthma history**

**Figure S2e. Proportion with 4+ acute infections in prior year**

**Figure S2f. Proportion with 0 acute infections in prior year**

Figure S2a

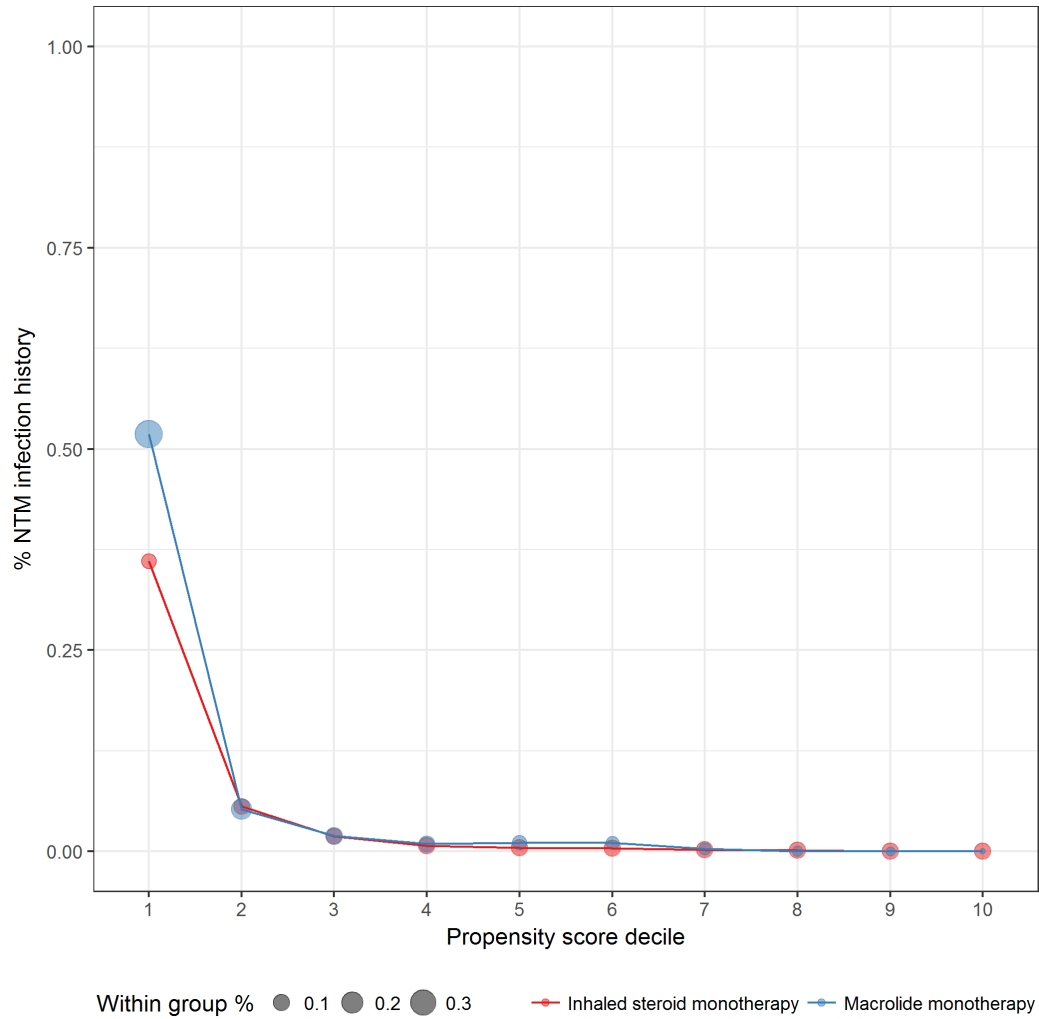

Figure S2b

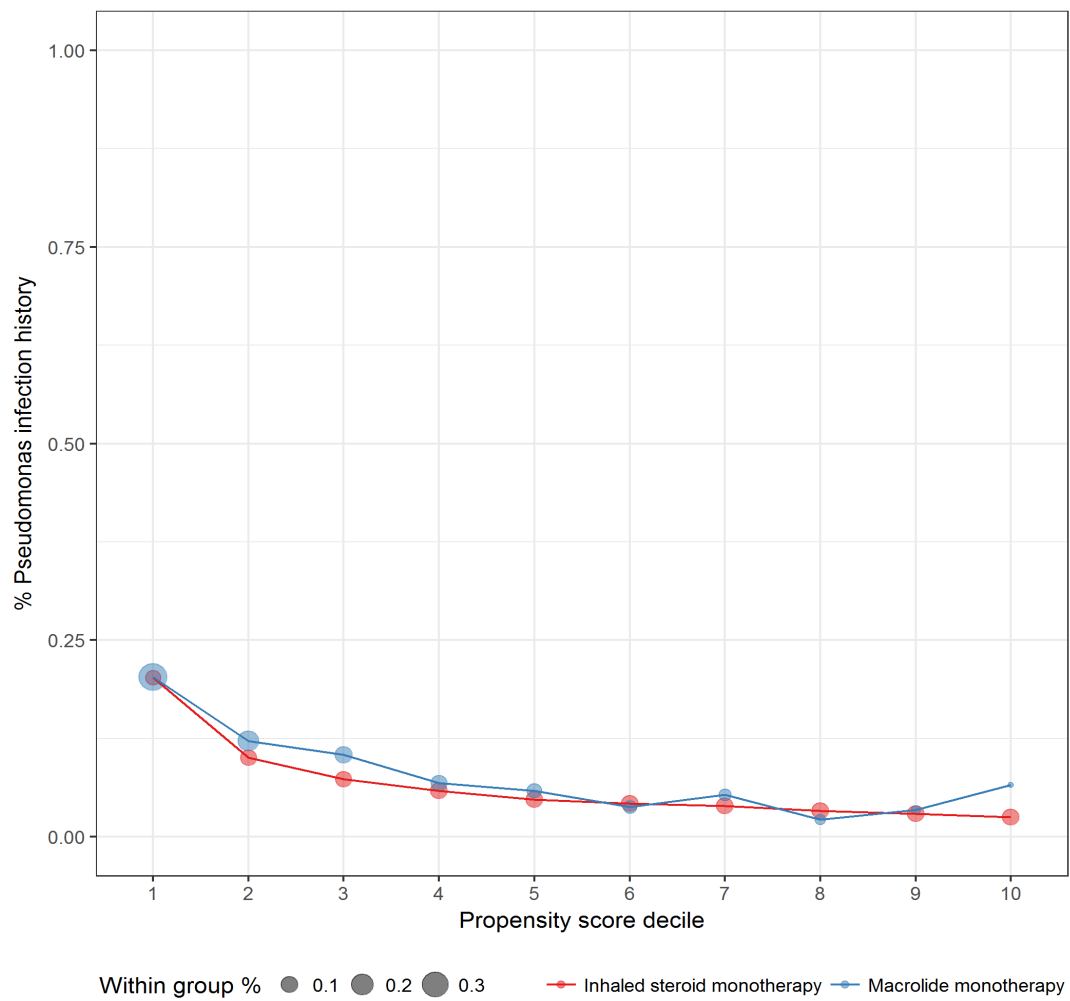

Figure S2c

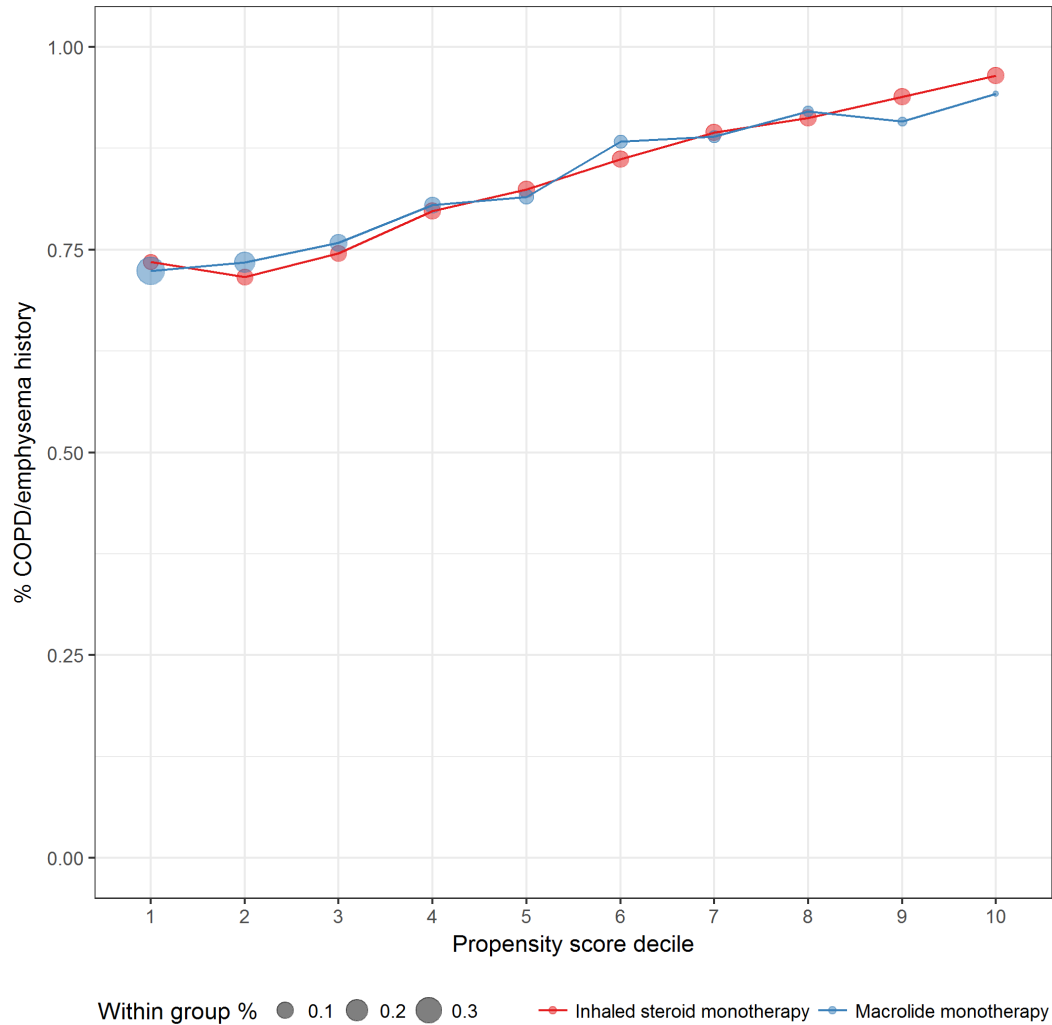

Figure S2d

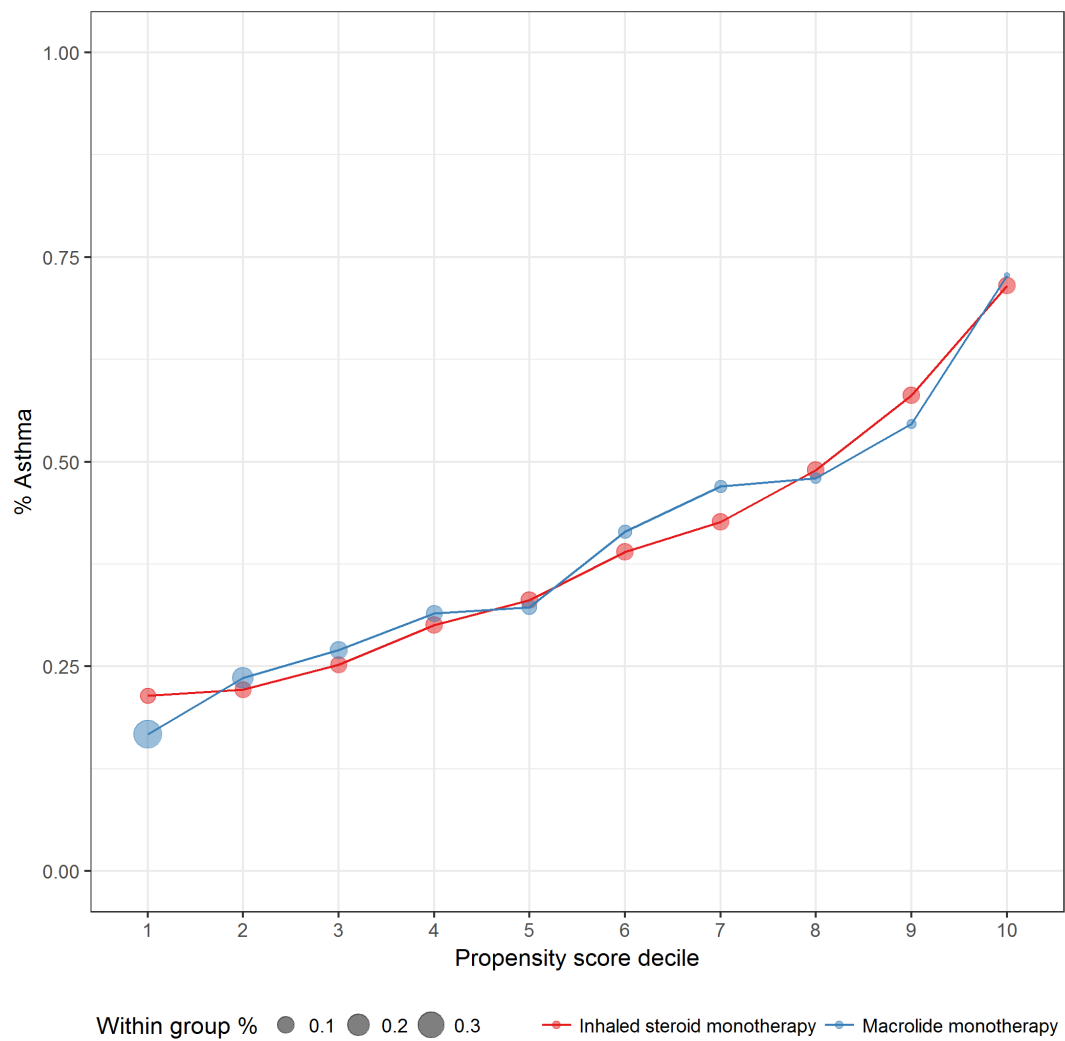

Figure S2e

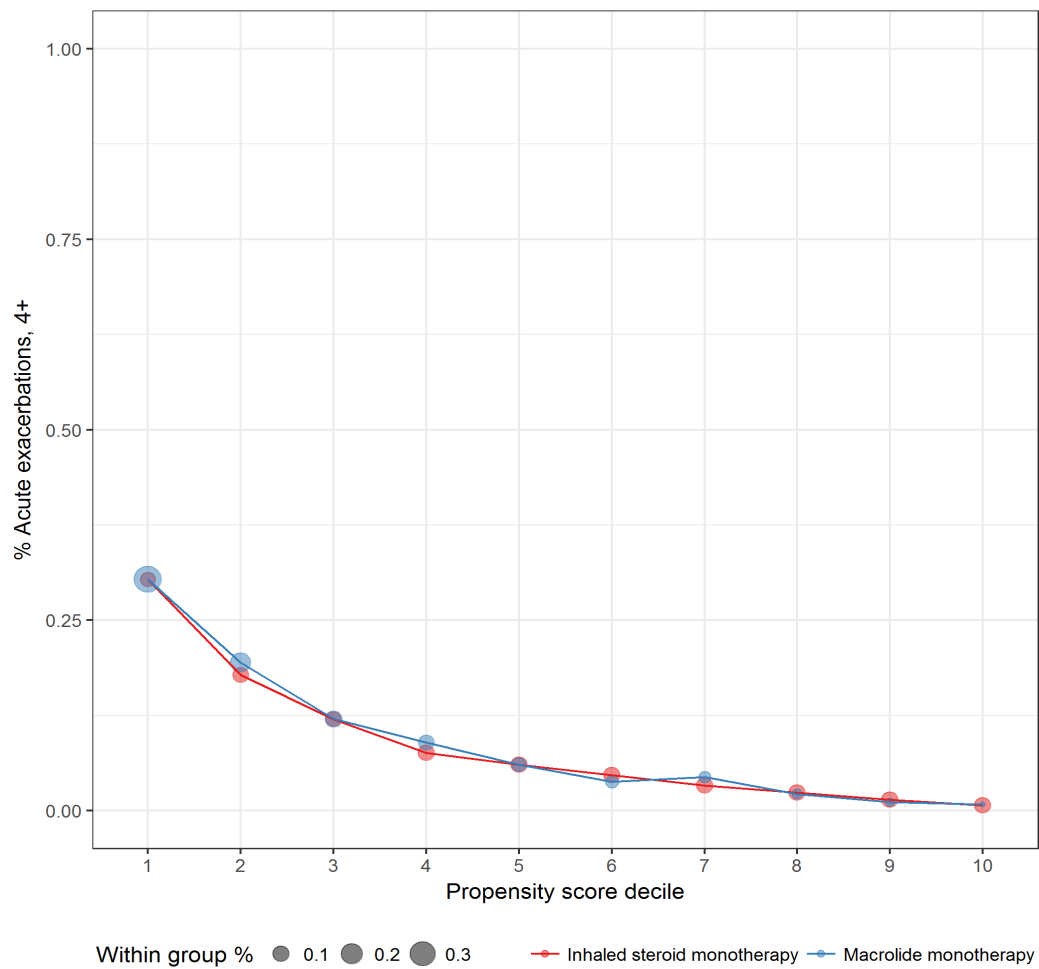

Figure S2f

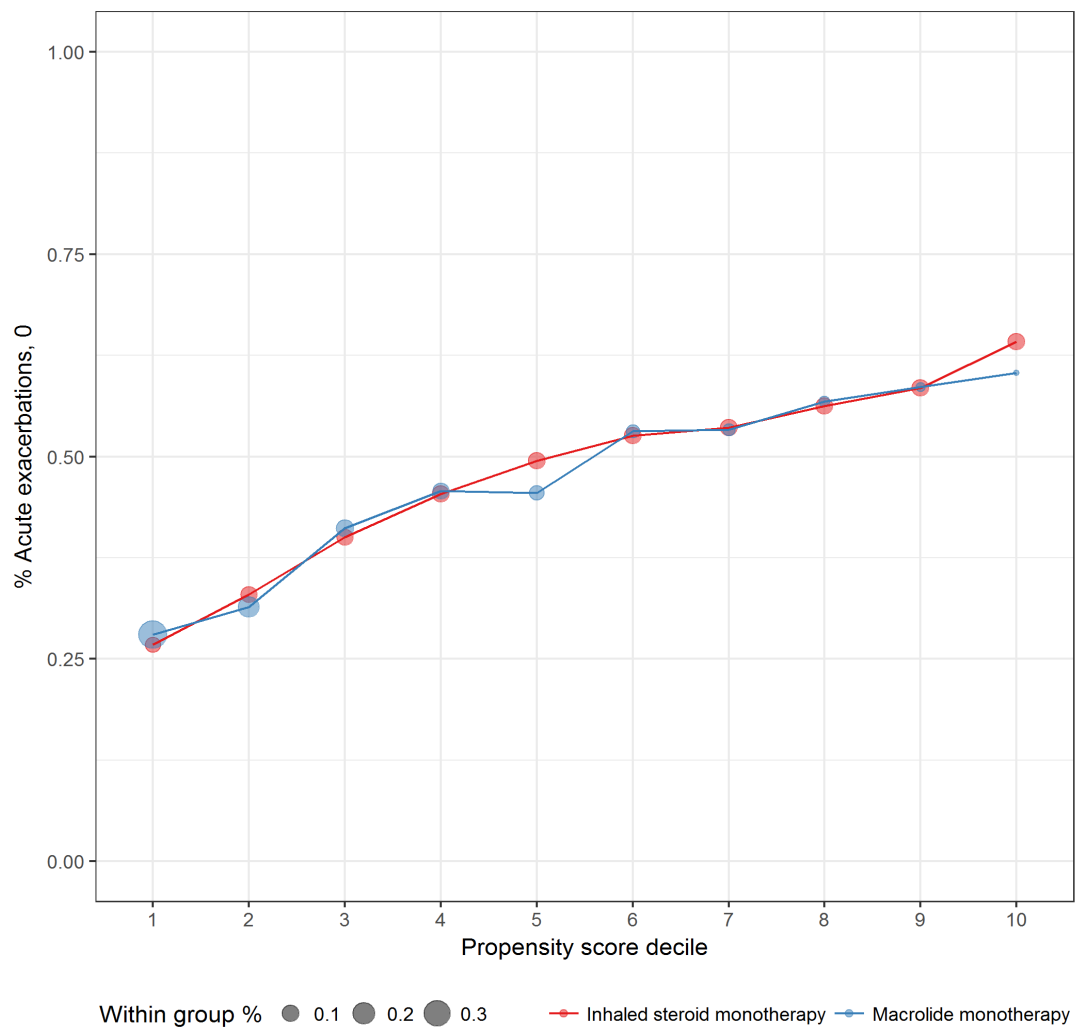

Supplement: inline-supplementary-material-1 [file inline-supplementary-material-1.pdf]
